# Supplementary material for: Integrative analysis of small non-coding RNAs predicts a piRNA/miRNA-CCND1/BRAF/HRH1/ATXN3 regulatory circuit that drives oncogenesis in glioblastoma
Source: Royal Society of Chemistry journal article supplement (doi:10.1039/d2mo00245k), 2023-01-09
Supplement: d2mo00245k1.pdf [file d2mo00245k1.pdf]

## Supplementary material

### **Integrative analysis of small non-coding RNAs predict a piRNA/miRNA- CCND1/BRAF/HRH1/ATXN3 regulatory circuit that drives oncogenesis in Glioblastoma**

Rojalin Nayak<sup>1</sup>, Trisha Chattopadhyay<sup>1</sup>, Pooja Gupta<sup>1</sup>, and Bibekanand Mallick<sup>1,\*</sup>

<sup>1</sup>RNAi and Functional Genomics Lab., Department of Life Science, National Institute of  
Technology, Rourkela-769008, Odisha, India

**Running title:** Dysregulated small RNAs implicated in oncogenicity of glioblastoma

\* **Correspondence to:** Dr Mallick, RNAi, and Functional Genomics Lab., Department of Life  
Science, National Institute of Technology, Rourkela, PIN-769008, Odisha, India

Emails: vivek.iitian@gmail.com, mallickb@nitrkl.ac.in

Tel: +91-661-2462685; Fax: +91-661-2472926

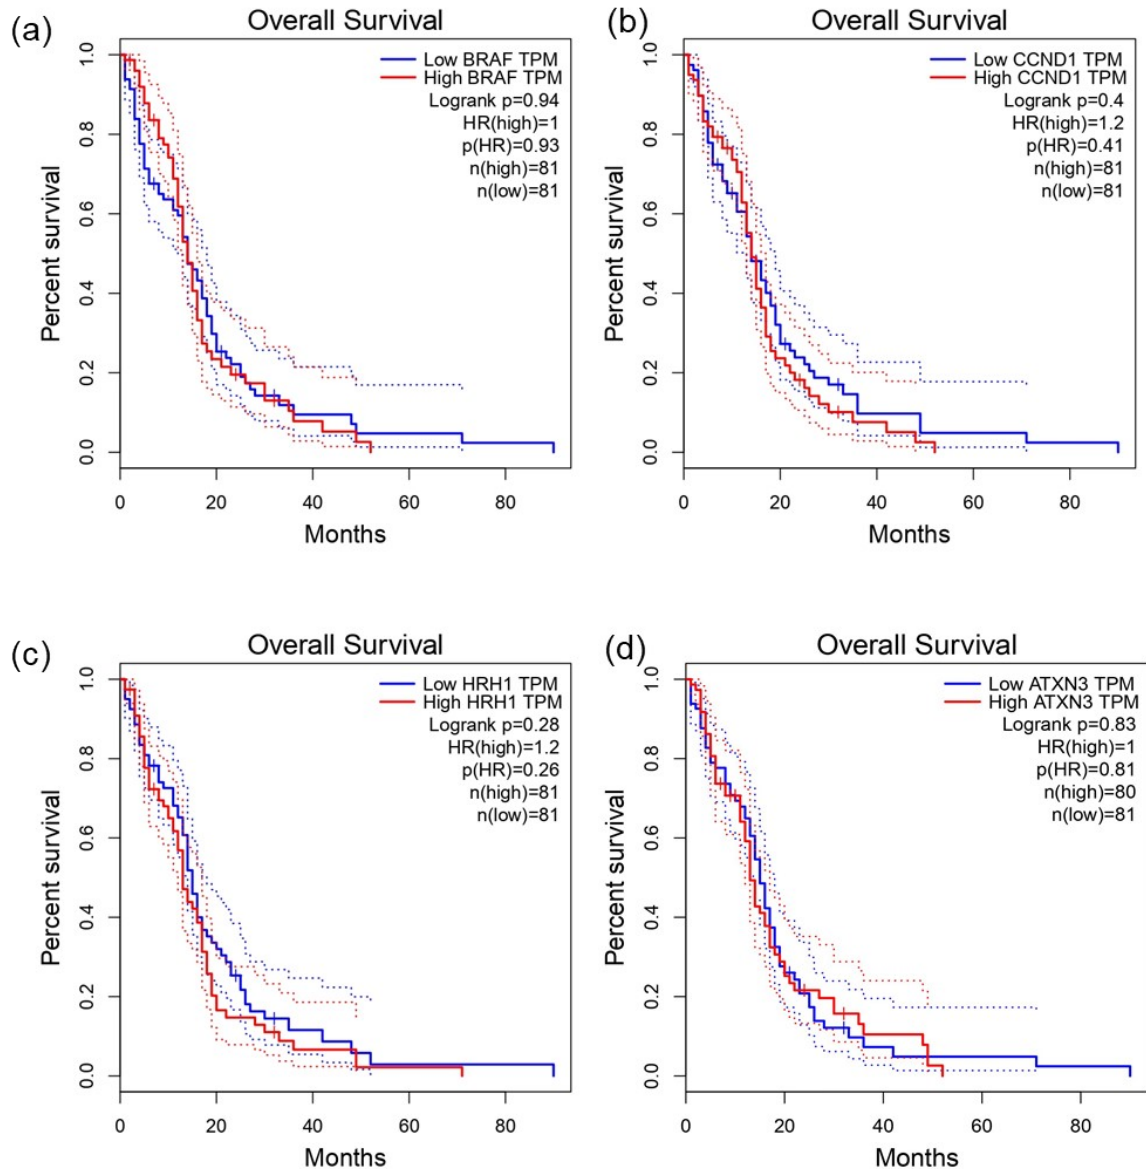

Supplementary **Fig S1**. The overall survival analysis of (a) BRAF, (b) CCND1, (c) HRH1, and (d) ATXN3. The high expression of all the genes shows lower survivability than low expression.

**Table S1** List of all primers used in the study for qRT-PCR

| Genes/miRNAs/piRNAs |   | Oligo sequences         |
|---------------------|---|-------------------------|
| PIWIL1 (HIWI)       | F | TCAGGAGTTATCGTTAGCAGAG  |
| PIWIL1 (HIWI1)      | R | TGTCAGCCCGAAATGGTTAGT   |
| PIWIL2 (HILI)       | F | AGGCAGAGGCCATGTATTTGG   |
| PIWIL2 (HILI)       | R | AAGCATTTCCCGTTTCAGAGG   |
| PIWIL4 (HIWI2)      | F | GAAGCATCCTCTAGCAATGGC   |
| PIWIL4 (HIWI2)      | R | CCATGAAGGTACTTCCAGCATCA |
| BRAF                | F | CCCCAAGTCACCACAAAACC    |
| BRAF                | R | CGGACTGTA ACTCCACACCTT  |
| HRH1                | F | AGATGTGTGAGGGCAACAAGA   |
| HRH1                | R | CAAGCAGATAGTGCTCAGGA    |

|                 |   |                         |
|-----------------|---|-------------------------|
| ATXN3           | F | GCCTCTGATACTCTGGACTGTT  |
| ATXN3           | R | TGTGCTCAACATTGCCTGAA    |
| CCND1           | F | GCTGCGAAGTGGAAACCATC    |
| CCND1           | R | CCTCCTTCTGCACATTTGAA    |
| RPL13           | F | GTTCGGTACCACACGAAGGT    |
| RPL13           | R | TACGGAGACTAGCGAAGGCT    |
| piR-36182       | F | ATTACAGGCCTGAGCCACTGT   |
| piR-56037       | F | TGGGATTACAGGCATGAGC     |
| piR-51761       | F | AGGCTGGAGTGCAGTGCT      |
| piR-59425       | F | TTGCCCAGGCTGGAGTGCAGTA  |
| piR-50603       | F | AGCCTGGGTGACAGAGTGT     |
| hsa-miR-5p      | F | TCGTACCGTGAGTAATAATGCG  |
| hsa-miR-378i    | F | ACTGGACTAGGAGTCAGAAGG   |
| hsa-miR-105-5p  | F | AACACGCTCAAATGCTCAGACTC |
| hsa-miR-365a-3p | F | TAATGCCCTAAAAATCCTTAT   |
| hsa-miR-5001-3p | F | TTCTGCCTCTGTCCAGGTCCTT  |
| U6              | F | CTCGCTTCGGCAGCACATATACT |
| U6              | R | ACGCTTCACGAATTTGCGTGTC  |
